# Supplementary material for: Modulation of the band structures and optical properties of holey C2N nanosheets by alloying with group IV and V elements
Source: Royal Society of Chemistry journal article supplement (doi:10.1039/c6tc02469f), 2016-01-01
Supplement: c6tc02469f1.pdf [file c6tc02469f1.pdf]

## **Electronic Supplementary Information (ESI)**

### **Band structures and optical properties modulation of holey C<sub>2</sub>N nanosheets by alloying with group IV and V elements**

Juan Du,<sup>a</sup> Congxin Xia,<sup>\*a</sup> Tianxing Wang,<sup>a</sup> Wenqi Xiong<sup>a</sup> and Jingbo Li<sup>\*b</sup>

a) Department of Physics, Henan Normal University, Xinxiang, Henan  
453007, China

b) Institution of semiconductor, Chinese Academy of Science, Beijing,  
100083, China

**\*E-mail: [xiacongxin@htu.edu.cn](mailto:xiacongxin@htu.edu.cn) and [jbli@semi.ac.cn](mailto:jbli@semi.ac.cn)**

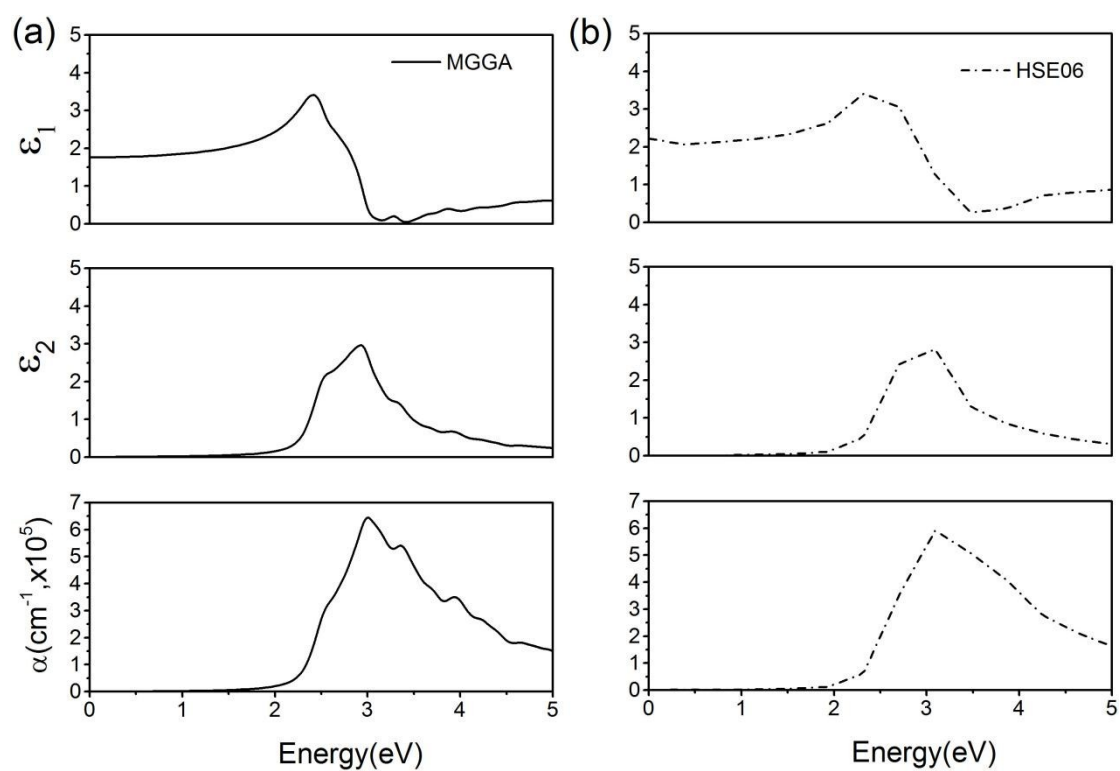

Fig. S1 The real part  $\epsilon_1(\omega)$ , imaginary part  $\epsilon_2(\omega)$  of the dielectric function and the optical absorption coefficients as a function of photon energy along the x-y plane of the 2D C<sub>2</sub>N unitcell using the (a)MGGGA and (b)HSE06 methods, respectively.
